# Supplementary material
Source: HighWire-hosted journal article supplement (https://tobaccocontrol.bmj.com/content/28/6/696)
Supplement: inline-supplementary-material-1 [file inline-supplementary-material-1.pdf]

## Supplementary File 1. Survey participants

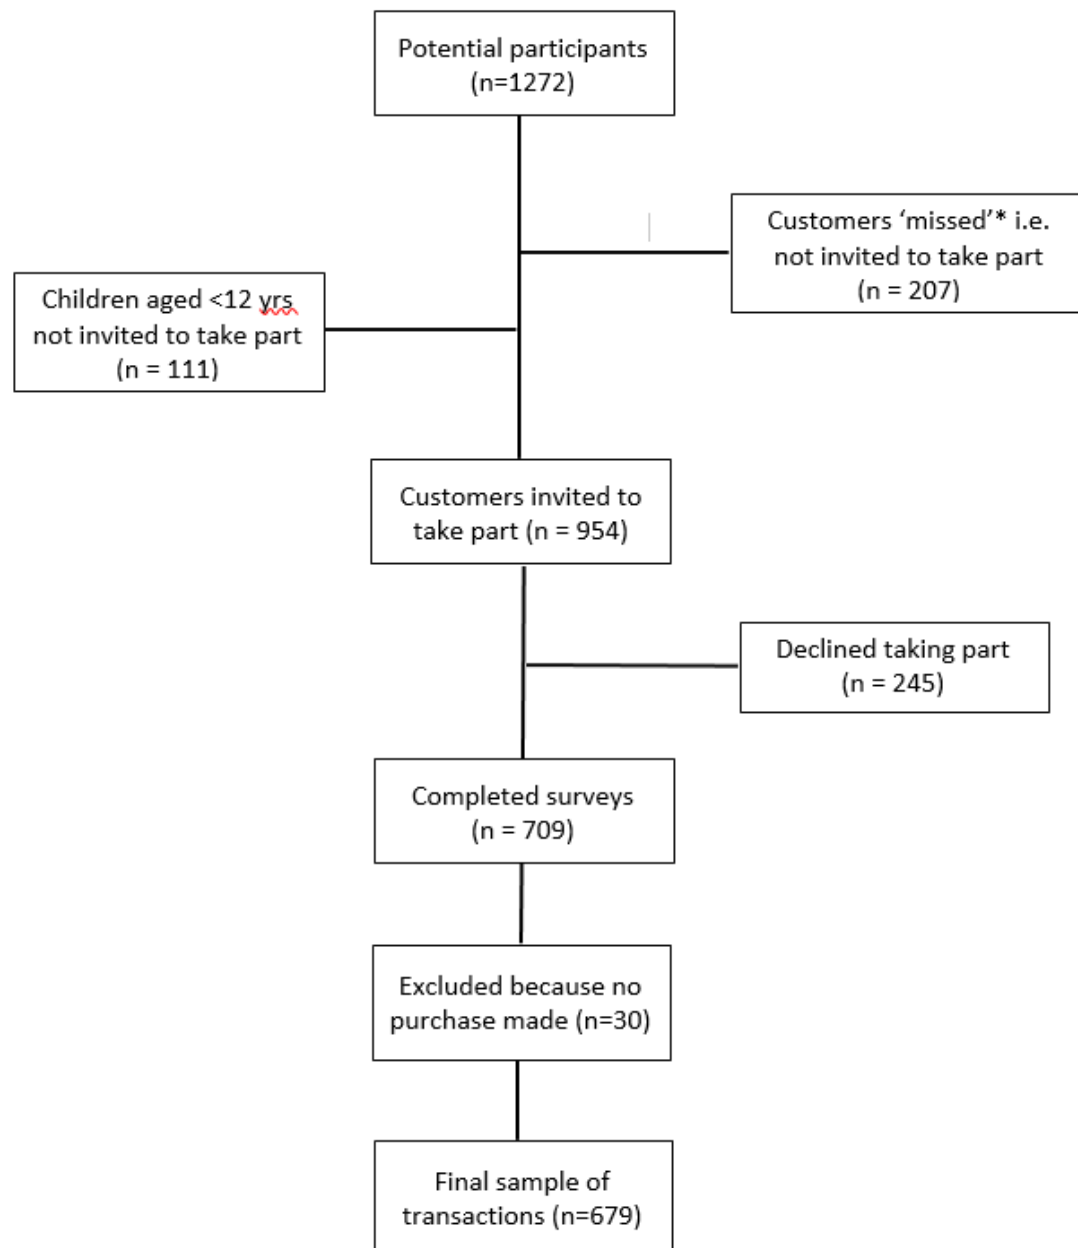

\* A customer was 'missed' if the interviewer was not able to invite the person to participate, due to interviewing another customer.
